1 ORIGINAL RESEARCH

2 Zen et al

## 3 **A Multi-center Study of COVID-19 with Multivariate Prognostic**

### 4 **Analysis**

5

6 Wen Zeng\*<sup>1</sup>

7 Xin Feng\*<sup>1</sup>,

8 Jie Huang\*<sup>2</sup>

9 Chuan Du\*<sup>3</sup>

10 Dongming Qu\*<sup>4</sup>

11 Xiang Zhang<sup>5</sup>

12 Jianquan Zhang<sup>1</sup>

13 <sup>1</sup> Department of Respiratory and Critical Care Medicine, The First Affiliated Hospital of Guangxi Medical  
14 University, Nanning, Guangxi 530021, China

15 <sup>2</sup>The Fourth People's Hospital of Nanning City, Nanning, Guangxi, 530021, China

16 <sup>3</sup>Hubei No.3 People's Hospital of Jiangnan University, Wuhan, Hubei,430000, China

17 <sup>4</sup>Nanxishan Hospital of Guangxi Zhuang Autonomous Region, Guilin, Guangxi, 541000, China

18 <sup>5</sup>Wuhan Huangpi District Hospital of Traditional Chinese Medicine, Wuhan, Hubei, 430000, China

19 \* These authors contributed equally to this project and should be considered co-first authors.

### 20 **Correspondence:**

21 Jianquan Zhang, MD, PhD

22 Department of Respiratory and Critical Care Medicine,1 Guangxi 530021, China

23 E-mail: jqzhang2002@126.com

24 Tel.: +86 139 7812 3845

25 Fax: +86 0771 535 0031

26

27 **Abstract:**

28 **Purpose:** Coronavirus disease (COVID-19) pandemic is now a global health concern.

29 However, there is no detailed analysis of the factors related to patients' improvement.

30 **Patients and methods:** We compared the clinical characteristics, laboratory findings, CT  
31 images, and treatment of COVID-19 patients from two different cities in China. One hundred  
32 and sixty-nine patients were recruited from January 27 to March 17, 2020 at five hospitals in  
33 Hubei and Guangxi. They were divided into four groups according to age and into two groups  
34 according to presence of comorbidities. Multivariate statistical analyses were performed for  
35 the prognosis of the disease.

36 **Results:** Fifty-two patients (30.8%) had comorbidities, and the percentage of critical  
37 COVID-19 was higher in the comorbidities group (11.6% vs. 0.9%,  $p < 0.05$ ). Older patients had  
38 higher proportion of severe or critical disease. The results showed that lymphocyte count was  
39 significantly associated with the number of days from positive COVID-19 nucleic acid test to  
40 negative test; number of days from onset of symptoms to confirmation of diagnosis was  
41 significantly associated with the time it took for symptoms to improve; and number of days  
42 from onset of symptoms to confirmation of diagnosis and disease severity were significantly  
43 associated with chest computed tomography improvement.

44 **Conclusions:** Age, comorbidities, lymphocyte count, and SpO<sub>2</sub> may predict the risk of severity  
45 of COVID-19. Early isolation, early diagnosis, and early initiation of management can slow  
46 down the progression and spread of COVID-19.

47

48 **Keywords:** COVID-19; Severity; Multiple lung lobe involvement, prognosis

49 **Key Points:** Age and comorbidities can predict the risk of severity of COVID-19,  
50 Lymphocyte count and SpO<sub>2</sub> may predict the risk of severity of COVID-19. Early isolation,  
51 Early diagnosis can slow down the progression of COVID-19

52

## 53 **1.Introduction**

54 Coronavirus disease 2019 (COVID-19), which is caused by severe acute respiratory syndrome  
55 coronavirus2 (SARS-CoV-2), has spread throughout the world, posing a critical threat to  
56 global health. COVID-19 has been declared as a public health emergency by the World Health  
57 Organization, and 3,175,207 laboratory-confirmed infections had been reported globally by  
58 May 1, 2020.<sup>1</sup> Several studies have described the clinical characteristics and epidemiology of  
59 COVID-19.<sup>2-6</sup> The novel corona virus has caused clusters of severe respiratory illness, similar  
60 to severe acute respiratory syndrome coronavirus.<sup>2,5</sup> Previous studies have also summarized  
61 the early clinical, laboratory, and computed tomography (CT) findings of COVID-19  
62 pneumonia.<sup>3,6</sup> A multi-center study of clinical features showed that multiple organ dysfunction  
63 and impaired immune function were the typical characteristics of severe and critical disease,  
64 and advanced age ( $\geq 75$  years) was a risk factor for mortality.<sup>4</sup> However, there is no detailed  
65 analysis of the factors related to patients' improvement. In this study, we analyzed the clinical  
66 features, laboratory findings, CT images, outcomes, and therapies (including antiviral drugs,  
67 antibacterial drugs, and corticosteroids) in 169 COVID-19 cases from three cities (Nanning and  
68 Guilin in Guangxi Province, and Wuhan in Hubei Province). We also analyzed the factors  
69 related to patients' improvement.

70

## 71 **2.Methods**

### 72 2.1. Study design and participants

73 Patients who were  $\geq 18$  years old were recruited for this multi-center retrospective study from  
74 five hospitals designated for the treatment of COVID-19 in China, namely Guangxi Medical  
75 University First Affiliated Hospital and The Fourth People's Hospital of Nanning City, both in  
76 Nanning; Nanxishan Hospital of Guangxi Zhuang Autonomous Region, in Guilin, Guangxi  
77 Province; and Wuhan Huangpi District Hospital of Traditional Chinese Medicine and Hubei  
78 No.3 People's Hospital of Jiangnan University, both in Wuhan, Hubei Province. The  
79 recruitment period was from January 27 to March 17, 2020. All patients enrolled in this study  
80 were diagnosed with COVID-19 according to the diagnostic criteria from the Chinese Clinical  
81 Guidance for COVID-19 Pneumonia Diagnosis and Treatment (7th edition), which was  
82 produced by the National Health Commission of China.<sup>7</sup> The study was approved by the  
83 Research Ethics Commission of Guangxi Medical University First Affiliated Hospital  
84 approval number: 2020(KY-E-06).

85 We grouped the patients according to their ages into group A (18–44 years), group B (45–64  
86 years), group C (64–74 years), and group D (>75 years). Analysis of prognosis of improvement  
87 included three aspects: number of days from positive COVID-19 nucleic acid test to negative  
88 test, number of days from onset of illness (the first day of presenting with COVID-19-related  
89 symptoms, such as fever, cough, and diarrhea) to improvement in symptoms, and improvement  
90 on the second CT scan. The primary outcomes were improvement and death.

91

### 92 2.2. Definitions

93 According to the Chinese Clinical Guidance for COVID-19 Pneumonia Diagnosis and  
94 Treatment (7th edition), COVID-19 is classified by severity into mild, moderate, severe, and  
95 critical types.<sup>7</sup>

96

### 97 2.3. Data collection

98 The medical records of the recruited COVID-19 patients were reviewed and general  
99 information, epidemiological data, and data on clinical presentation, laboratory tests, chest CT  
100 scan findings, treatment modalities, and outcome were collected. Clinical data collection was  
101 completed on March 17, 2020. Du Chuang and Huang Jie cross-checked the data. The local  
102 Center for Disease Control (CDC) laboratories made definitive diagnosis of COVID-19 by  
103 analyzing throat-swab specimens from the upper respiratory tract or feces. Real-time reverse  
104 transcription polymerase chain reaction (RT-PCR) was used to confirm COVID-19<sup>2</sup> and  
105 exclude other viral infections. All patients underwent chest CT scan. Two attending  
106 radiologists were invited to interpret all chest CT scans independently, and they were blinded  
107 to the clinical information of each patient. The following CT features were assessed:  
108 distribution of lesions (peripheral, along the bronchi, random, or diffuse), number of lobes  
109 involved (one, two or three, or four or five), shape of lesions (patchy or nodular), appearance  
110 (ground-glass opacity [GGO], consolidation, or GGO with consolidation), specific focal signs  
111 (vascular thickening, crazy paving pattern, and fibrosis), and extrapulmonary manifestations  
112 (mediastinal and hilar lymph node enlargement, pleural effusion, or pleural thickening). In case  
113 of discordance between the interpretations of the two radiologists, the opinion of a third deputy  
114 chief physician radiologist was sought to reach a final decision. Data on follow-up, prognosis,

115 and treatment were updated on April 24, 2020.

#### 116 2.4. Statistical analyses

117 Continuous variables were expressed as medians with interquartile ranges (IQR), and  
118 categorical variables were reported as frequencies and percentages. Differences between  
119 groups were compared using the independent samples t-test or Mann-Whitney test. The single  
120 factor analysis of variance (ANOVA) or Kruskal-Wallis H test was used, as appropriate, to  
121 compare the difference among the four groups into which patients were divided based on  
122 severity of the disease. Least significant difference (LSD) or Dunn's test was used for post hoc  
123 comparisons. Categorical data were analyzed either with Pearson Chi-square test or with  
124 Fisher's exact test. Two-tailed tests were performed to determine statistical significance at the  
125 5% level. Bonferroni correction was used for pairwise comparison.

126 Univariable and multivariable analyses for factors associated with the time for nucleic acid test  
127 to turn negative and the time of improvement of symptoms were performed with multiple  
128 linear regression analyses. Univariable and multivariable analyses for factors that are  
129 associated with chest CT improvement were done with Kaplan-Meier method and Cox  
130 proportional hazards regression model. Univariable and multivariable analyses for risk factors  
131 for disease severity and the relationship between age and disease severity were performed with  
132 logistic regression analyses. All data analyses were carried out using IBM Statistical Package  
133 for the Social Sciences for Windows, version 25 (SPSS Inc., Chicago, Illinois), and graphs  
134 were created using GraphPad Prism 7.0 software (GraphPad Software Inc., San Diego, CA,  
135 USA). P value less than 0.05 was considered statistically significant.

### 136 **3.Results**

137 The median age of the patients was 52.8 years (IQR, 19–82). Male patients accounted for  
138 46.7% of all patients. Based on severity, 12 patients (7.1%) had mild COVID-19, 137(81.1%)  
139 patients had moderate type, 13(7.7%) patients had severe type, and 7(4.1%) patients had  
140 critical type. The median number of days from the onset of illness to admission was 11.6 days  
141 (IQR, 18–92). Fifty-two patients had comorbidities, including hypertension, cardiovascular  
142 disease, diabetes, malignancy, cerebrovascular disease, chronic obstructive pulmonary  
143 disease(chronic obstructive pulmonary disease), chronic nephropathy, immunosuppression,  
144 and others. The most common morbidity was hypertension(17.8%). Clinical symptoms  
145 included fever, cough, sputum production, dry cough, pharyngalgia, shortness of breath,  
146 hemoptysis, myalgia, digestive symptoms, hypodynamia, and others. Fever was the most  
147 common symptom (76.9%), followed by dry cough (68%). Among the 169 patients, the  
148 lymphocyte count was decreased in 111 (65.68%) patients (median=1.24 (IQR=0.18–4.11)  
149  $\times 10^9/L$ ). C-reactive protein (CRP) increased in 102 (65.39%) patients, lactate dehydrogenase  
150 (LDH) increased in 52 (33.33%) patients, and D-dimer increased in 55 (35.95%) patients.  
151 Alanine transaminase or aspartate aminotransferase was elevated in 56 patients (33.17%).  
152 Serum creatinine was elevated in 5 patients (2.96%), 4 patients had chronic nephropathy, and 1  
153 patient's renal function returned to normal after treatment. One hundred and fifty-four (90.1%)  
154 patients received antiviral therapy within the first 3 days. Antivirals used included lopinavir,  
155 tonavir, abidor, ribavirin, ganciclovir, and oseltamivir. Most patients (53.9%) received  
156 antibacterial therapy, including moxifloxacin, cephalosporins, and azithromycin. Forty-eight  
157 (28.4%) patients received corticosteroids. One hundred and sixty-five (97.60%) patients  
158 improved, while four patients died.

159 Among the 169 patients, 121 were from hospitals in Wuhan, while 48 were from hospitals  
160 in Guangxi. We compared the clinical data between the two groups. The Guangxi group had  
161 fewer days from onset of illness to admission (5.24:14.09) ( $p<0.05$ ). Cough and sputum  
162 production were more common in the Wuhan group( $p<0.05$ ). The total protein and albumin in  
163 patients from Wuhan group were lower, while LDH was higher ( $p<0.05$ ). The four patients  
164 who died were all in Wuhan group (Table 1).

165 Among the 4 age groups into which patients were stratified, groups C and D had higher  
166 proportions of severe and critical disease than the other 2 groups, and group C had the highest  
167 proportion of severe disease among the 4 groups. Group A had the least proportion of patients  
168 with dyspnea, while group C had the highest. In both group C and group D, oxygen  
169 saturation( $SpO_2$ )was lower than 94%, and group C had the lowest  $SpO_2$ .The lymphocyte  
170 count was lower in groups C and D than in groups A and B. LDH in group A was the lowest.  
171 CRP, pro-calcitonin (PCT), and interleukin (IL)-6 were significantly higher in groups C and D  
172 than in groups A and B. (Table2).

173 Fifty-two patients (30.8%) in the study had comorbidities. Compared with patients who had no  
174 comorbidities, the percentage of critical COVID-19 was higher in the comorbidities  
175 group(11.6%vs.0.9%;  $p<0.05$ ).Patients with comorbidities were also more likely to have  
176 dyspnea(36.5% vs. 16.2%;  $p<0.05$ ).The total protein and albumin values and lymphocyte  
177 counts in patients with comorbidities were lower, while increase in CRP and LDH was more  
178 obvious in this group.All4 patients who died had comorbidities(Table3).

179 To determine the association of disease severity with age, we divided all patients into 5 groups  
180 at intervals of 15 years, and analyzed the frequencies of severe and critical disease. We found



181 that older patients had higher proportion of severe or critical disease(Table 4).The 169 patients  
182 were also divided into two groups—mild group(including mild type and moderate type  
183 COVID-19,n=148) and severe group(including severe and critical type COVID-19,  
184 n=21)—and we then analyzed the risk factors for disease severity. The results showed that  
185 lymphocyte count and SpO<sub>2</sub> at admission were factors that determined the risk factor of  
186 disease severity (Table5).

187 A total of 116 patients with CT image data were enrolled in this study. The average time from  
188 onset of illness to CT imaging was  $10.73\pm 7.97$  ( 0–34 ) days. The first CT imaging findings of  
189 the 116 patients were analyzed, and we found that 84(72.41%) patients had bilateral lung  
190 involvement,88(75.86%) patients hadperipheral lesions, and99(85.3%) patients had  
191 involvement of two or more lung lobes. The most common CT features were consolidation  
192 (66.4%), GGO (55.2%), linear opacity (55.20%), and mixed GGO and consolidation (33.60%).  
193 Forty (34.48%) patients had vascular thickening.

194 We further divided the patients into 6 groups according to the number of days from onset  
195 of illness to repeat chest CT imaging: group1( $\leq 7$ days, n=59), group2(8–14days, n=92),  
196 group3(15–21days, n=109), group4(22–28days, n=60), group5(29–45days, n=52), and  
197 group6(46–60days, n=18). Among the groups, group 1 had the highest percentage of GGO  
198 (48cases,81.4%), and the least percentage of linear opacity (20cases, 33.9%). Group 2 had the  
199 highest percentage of consolidation (72cases,78.3%). The proportion of cases with linear  
200 opacity gradually increased from group1 to group6, reaching 98.1% in group6.There were  
201 4casesof reticular changes in group1,and the proportion gradually increased to group 6, in  
202 which there were 7cases(Table 6).

203 To monitor the changes in CT images during the course of the disease, we considered the  
204 dynamic changes in the CT images of two patients from Guangxi, from onset to improvement  
205 of the disease: one with severe disease (patient1, Figure1) and the other with moderate disease  
206 (patient 2, Figure 2). As shown in Figure 1, patient 1 had ground glass opacity on chest CT in  
207 the early stage of the disease, and consolidation was noted on chest CT done on day 13 from  
208 onset of illness, as the patient's clinical symptoms improved. Consolidation had resolved on  
209 day 18 from onset of illness. Finally, the patient had linear opacity on day 23 from onset of  
210 illness. There were fifty-one patients when their clinical symptoms improved and they had  
211 checked chest CT (no more than 1 day before and after). Among them, the first CT findings  
212 were mainly GGO in 36 cases. When their clinical symptoms improved, 16 cases (44.4%)  
213 showed resolution of ground glass opacities but increased consolidation on repeat CT imaging,  
214 while 16 cases (44.4%) showed both GGO and resolution of consolidation.

215 All 169 patients had positive real-time RT-PCR for COVID-19 nucleic acid on nasopharyngeal  
216 swab specimens. Twenty-five patients underwent nucleic acid test on stool samples: seven of  
217 them were positive, and six among them had diarrhea. Twenty patients underwent nucleic acid  
218 test of urine samples: one was positive, but he did not have symptoms of urinary tract infection.  
219 Vaginal secretions and semen tests were performed in 6 patients, all of which were negative.

220 We designed three prognostic models: model 1 was based on number of days from positive  
221 COVID-19 nucleic acid test to negative test, model 2 was based on number of days from onset  
222 of illness to improvement in symptoms, and model 3 was based on whether the second CT scan  
223 was better than the first. There were 79 cases included in model 1, and multivariable analysis  
224 showed that lymphocyte count was significantly associated with the number of independent

225 risk factor of days for positive COVID-19 nucleic acid test to become negative (Table 7, Figure  
226 3). There were 53 cases included in model 2, and multivariable analysis showed that number of  
227 days from onset of illness to confirmation of diagnosis was significantly associated with an  
228 independent risk factor of the time it took for symptoms to improve (Table 8, Figure 4). The  
229 average number of days from the first CT scan to the second CT scan was 5.35 days, and we  
230 took 6 days as the time point for evaluating whether the CT scans improved or not. A total of 62  
231 patients were included in model 3, and multivariable analysis showed that number of days from  
232 onset of illness to confirmation of diagnosis and disease severity were significantly associated  
233 with independent risk factors of chest CT improvement (Table 9).

#### 234 **4. Discussion**

235 This study summarizes the clinical characteristics, laboratory findings, dynamic changes in CT  
236 images, treatment, and prognosis of 169 COVID-19 patients from 5 hospitals in a western  
237 China city and in the city of disease onset, Wuhan. The study included mostly mild cases of  
238 COVID-19, which accounted for 88.2%. We analyzed the disease progression in three ways:  
239 number of days from positive COVID-19 nucleic acid test to negative test, number of days  
240 from onset of illness to improvement in symptoms, and improvement in second CT scan  
241 compared to the first. At present, no similar large sample data has been reported.

242 The study showed that the common symptoms of COVID-19 were fever, cough, sputum  
243 production, dyspnea, diarrhea, and myalgia. The main abnormalities in laboratory tests  
244 included that lymphocytopenia and increase in levels of CRP, LDH, and D-dimer, while PCT  
245 was normal. These findings are consistent with other literature reports.<sup>4,5,8,9</sup> The most  
246 common comorbidities were hypertension, cardiovascular disease, and diabetes. Chronic

247 obstructive pulmonary disease was rare. Both clinical symptoms and laboratory tests indicated  
248 that patients with comorbidities had worse course of the disease, with higher proportion of  
249 severe or critical disease and poorer prognosis. Patients with comorbidities manifested with  
250 more dyspnea, lower lymphocyte count, and higher LDH, compared with those who had no  
251 comorbidities. These were manifestations of COVID-19 disease, rather than worsening  
252 symptoms of the comorbidities due to infection with SARS-Cov-2. We also found that the  
253 proportion of critical type COVID-19 increased with age. Lower lymphocyte count and  
254 SpO<sub>2</sub> were found in a higher proportion of patients with severe or critical type. These findings  
255 suggest that healthcare providers should pay particular attention to age, comorbidities,  
256 lymphocyte count, and SpO<sub>2</sub> in the diagnosis and treatment of COVID-19. These factors may  
257 predict the progression of the patient from moderate to severe or critical type.

258 Early CT findings showed that the lung lesions were mainly bilateral, mainly involved two  
259 or more lobes, and were mainly distributed in the peripheral zones of the lung. GGO,  
260 consolidation and mixed GGO and consolidation were the most common CT findings, while  
261 pleural effusion was rare. This is also consistent with previous literature reports.<sup>10</sup> Through  
262 statistical analysis of lung CT imaging on different days in the course of the disease, we found  
263 the following progression: the early CT finding was GGO (1–7 days); the GGO lesion resolved  
264 or gradually evolved into consolidation shadow (1–2 weeks); consolidation resolved (2–3  
265 weeks); then, linear opacity or reticular changes developed (4–6 weeks). The whole course took  
266 about a month. In the statistical analysis of the correlation between symptom improvement and  
267 pulmonary imaging changes in 36 patients, nearly half of the patients (16/36) showed  
268 resolution of GGO lesions and aggravation of consolidation lesions when the clinical

269 symptoms improved. Histological Lung biopsy specimen showed interstitial mononuclear  
270 inflammatory infiltrates (dominated by lymphocytes), diffuse alveolar damage with cellular  
271 fibro-myxoid exudate, or hyaline membrane formation.<sup>11</sup> This is different from what is seen in  
272 bacterial pneumonia. Therefore, the change in extent of GGO lesions can be used to predict the  
273 outcome of the disease, while consolidation shadow should not be used as a prognostic factor  
274 for the patients' condition.

275 In this study, all patients had positive nucleic acid tests for pharyngeal swabs. Seven cases had  
276 positive nucleic acid test for stool samples, but only six cases had diarrhea. One patient tested  
277 positive for urine nucleic acid test, which is a rare report at present, and may suggest that  
278 SARS-Cov-2 may cause urinary tract infection.

279 Most of the patients in this study were treated with antiviral drugs, including lopinavir and  
280 tonavir. Currently, there are no research data that show that such drugs have a clear effect on  
281 COVID-19. In this study, we found that the lower the lymphocyte count, the more the number  
282 of days for nucleic acid test to change from positive to negative. The longer the duration from  
283 onset of illness to admission, the longer the duration before improvement of symptoms, and the  
284 shorter the duration from onset of illness to admission, the shorter the duration for CT image  
285 improvement. Comparing patients in Hubei and Guangxi, we found that patients from Hubei  
286 had more severe disease and more days from onset of illness to admission than those from  
287 Guangxi. All of these findings suggest that early isolation, early diagnosis, and early initiation  
288 of management can contribute to slowing down the progression and spread of COVID-19.

289 The present study has some limitations. First, due to the limited number of cases, some  
290 results need to be further validated with more patients. Second, the effect of antiviral agents

291 and corticosteroidson COVID-19 needs further validation. Prospective studies should be  
292 performed to get more accurate results. Third, because this was a retrospective analysis, the  
293 time of CT imaging and nucleic acid test was not standardized and unified, t may have reduced  
294 the accuracy of the result. More cases need to be analyzed to obtain more information.

## 295 **5.Conclusions**

296 In this study, we found that older patients and patients with comorbiditieshad higher proportion  
297 of severe or critical type COVID-19. Lymphocyte count and and SpO2 at admission were  
298 associated with disease severity. Early isolation, early diagnosis, and early initiation of  
299 management can contribute to slowing down the progression and spread ofCOVID-19. These  
300 findings will be helpful for the diagnosis and treatment of COVID-19.

## 301 **Funding**

302 This research received no external funding.

## 303 **Disclosure**

304 The authors declare no conflicts of interest associated with this manuscript.

305

## 306 **Author Contributions**

307 WZ made substantial contributions to the conception and design of the study; acquisition, analysis, and  
308 interpretation of the data; and drafting of the manuscript. XF, JH, CD and DQ made substantial contributions to  
309 the conception and design of the study; acquisition, analysis, and interpretation of the data; and critical revision  
310 of the manuscript for important intellectual content. XZ and JZ also gave final approval of the version to be  
311 published and agree to be accountable for all aspects of the work in ensuring that questions related to the

312 accuracy and integrity of any part of the work are appropriately investigated and resolved. JZ gave final  
313 approval of the version to be published. WZ and XF participated in analysis and interpretation of the data and  
314 agrees to be accountable for all aspects of the work in ensuring that questions related to the accuracy or integrity  
315 of any part of the work are appropriately investigated and resolved. WZ and JZ conceived of the study,  
316 participated in its design, and helped to draft the manuscript. All authors read and approved the final manuscript.

## 317 **Acknowledgements**

318 We would like to thank the three radiologists, Drs. Yanyan Shen, Peng Peng, Dong Deng, who helped with the  
319 analysis and interpretation of the imaging data.

## 320 **Ethical approval**

321 This study was approved by the ethics committee associated with the Faculty of Medicine at The First Affiliated  
322 Hospital of Guangxi Medical University[2020(KY-E-06)]. Informed consent was done appropriately for  
323 subjects.

324

## 325 **References**

- 326 1. World Health Organization. Situation Report-102. Available at:  
327 [https://www.who.int/docs/default-source/coronaviruse/situation-reports/20200501-covid-19-sitrep.pdf?sfvrsn=7](https://www.who.int/docs/default-source/coronaviruse/situation-reports/20200501-covid-19-sitrep.pdf?sfvrsn=742f4a18_4)  
328 42f4a18\_4. Accessed May 1, 2020.
- 329 2. Huang C, Wang Y, Li X, et al. Clinical features of patients infected with 2019 novel coronavirus in Wuhan,  
330 China. *Lancet* 2020;395:496. doi: 10.1016/S0140-6736(20)30252-X.
- 331 3. Han R, Huang L, Jiang H, Dong J, Peng H, Zhang D. Early clinical and CT manifestations of coronavirus  
332 disease 2019 (COVID-19) pneumonia. *Am J Roentgenol* 2020;1-6. doi: 10.2214/AJR.20.22961.
- 333 4. Feng Y, Ling Y, Bai T, et al. COVID-19 with different severity: a multi-center study of clinical features. *Am J*

- 334 Respir Crit Care Med 2020;201:1380-8.
- 335 5.Chen N, Zhou M, Dong X, et al. Epidemiological and clinical characteristics of 99 cases of 2019 novel  
336 coronavirus pneumonia in Wuhan, China: a descriptive study. Lancet 2020;395:507-13.doi:  
337 10.1016/S0140-6736(20)30211-7.
- 338 6.Rong W, Lingli X, Peng D, Fan H, Song M. Clinical characteristics of 96 hospitalized patients with  
339 coronavirus disease 2019.Chin J Respir Crit Care Med 2020;19:144-7.
- 340 7. China National Health Commission. Chinese Clinical Guidance for COVID-19 Pneumonia Diagnosis and  
341 Treatment (7th edition). Available at: <http://kify.meetingchina.org/msite/news/show/cn/3337.html>. Accessed on  
342 April 1, 2020.
- 343 8.Bassetti M, Vena A, Giacobbe DR. The novel Chinese coronavirus (2019-nCoV) infections: challenges for  
344 fighting the storm. Eur J Clin Invest2020;50:e13209.doi: 10.1111/eci.13209.
- 345 9.Holshue ML, Debolt C, Lindquist S, et al. First case of 2019 novel coronavirus in the United States. N Engl J  
346 Med2020;382:929-36.doi: 10.1056/NEJMoa2001191.
- 347 10.Li B, Li X, Wang Y, et al. Diagnostic value and key features of computed tomography in coronavirus disease  
348 2019.Emerg Microbes Infect2020; 9:787-93.doi: 10.1080/22221751.2020.1750307.
- 349 11.Xu Z, Shi L, Wang Y, et al. Pathological findings of COVID-19 associated with acute respiratory distress  
350 syndrome. Lancet Respir Med2020;8:420-2.doi: 10.1016/S2213-2600(20)30076-X.
- 351
- 352
- 353
- 354
- 355



356

357

358

359

360

361

362

363 **Table1: Clinical features of study subjects in different locations**

| Characteristics                                                    | All (n=169)            | Locations               |                       | p value          |
|--------------------------------------------------------------------|------------------------|-------------------------|-----------------------|------------------|
|                                                                    |                        | Wuhan(n=121)            | Guangxi(n=48)         |                  |
| <b>Median age (IQR) - yrs</b>                                      | <b>52.8 ( 18–92 )</b>  | <b>53.9 ( 25–92 )</b>   | <b>47.9 ( 18–85 )</b> | <b>0.027</b>     |
| <b>Sex - no./total no.(%)</b>                                      |                        |                         |                       | <b>0.881</b>     |
| <b>Male</b>                                                        | <b>79/169 ( 46.7 )</b> | <b>57/121 ( 47.1 )</b>  | <b>22/48 ( 45.8 )</b> | -                |
| <b>Female</b>                                                      | <b>90/169 ( 53.3 )</b> | <b>64/121 ( 52.9 )</b>  | <b>26/48 ( 54.2 )</b> | -                |
| <b>Disease Severity- no./total no.(%)</b>                          |                        |                         |                       | <b>0.073</b>     |
| <b>Mild</b>                                                        | <b>12/169 ( 7.1 )</b>  | <b>5/121 ( 4.1 )</b>    | <b>7/48 ( 14.6 )</b>  | -                |
| <b>Moderate</b>                                                    | <b>137/169( 81.1 )</b> | <b>103/121 ( 85.1 )</b> | <b>34/48 ( 70.8 )</b> | -                |
| <b>Severe</b>                                                      | <b>13/169 ( 7.7 )</b>  | <b>8/121 ( 6.6 )</b>    | <b>5/48 ( 10.4 )</b>  | -                |
| <b>Critical</b>                                                    | <b>7/169 ( 4.1 )</b>   | <b>5/121 ( 4.1 )</b>    | <b>2/48 ( 4.2 )</b>   | -                |
| <b>Days from onset of illness to admission - median days (IQR)</b> | <b>11.66 ( 0–45 )</b>  | <b>14.09 ( 0–45 )</b>   | <b>5.24 ( 1–20 )</b>  | <b>&lt;0.001</b> |
| <b>Symptoms - no./total no.(%)</b>                                 |                        |                         |                       |                  |
| <b>Fever</b>                                                       | <b>130/169( 76.9 )</b> | <b>96/121 ( 79.3 )</b>  | <b>34/48 ( 70.8 )</b> | <b>0.237</b>     |
| <b>Dry cough</b>                                                   | <b>115/169 ( 68 )</b>  | <b>88/121 ( 72.7 )</b>  | <b>27/48 ( 56.3 )</b> | <b>0.038</b>     |

|                                              |                                      |                            |                            |                  |
|----------------------------------------------|--------------------------------------|----------------------------|----------------------------|------------------|
| <b>Sputum production</b>                     | <b>46/169 ( 27.4 )</b>               | <b>45/121 ( 37.5 )</b>     | <b>1/48 ( 2.1 )</b>        | <b>&lt;0.001</b> |
| <b>Shortness of breath</b>                   | <b>38/169 ( 22.5 )</b>               | <b>31/121 ( 25.6 )</b>     | <b>7/48 ( 14.6 )</b>       | <b>0.121</b>     |
| <b>Myalgia</b>                               | <b>15/169 ( 8.9 )</b>                | <b>14/121 ( 11.6 )</b>     | <b>1/48 ( 2.1 )</b>        | <b>0.070</b>     |
| <b>Digestive symptoms</b>                    | <b>29/169 ( 17.3 )</b>               | <b>22/121 ( 18.3 )</b>     | <b>7/48 ( 14.6 )</b>       | <b>0.576</b>     |
| <b>Comorbidities-<br/>no./total no. (%)</b>  |                                      |                            |                            |                  |
| <b>Any comorbidity</b>                       | <b>52/169 ( 30.8 )</b>               | <b>40/121 ( 33.1 )</b>     | <b>12/48 ( 25.0 )</b>      | <b>0.306</b>     |
| <b>Hypertension</b>                          | <b>30/169 ( 17.8 )</b>               | <b>23/121 ( 19.0 )</b>     | <b>7/48 ( 14.6 )</b>       | <b>0.497</b>     |
| <b>Cardiovascular<br/>disease</b>            | <b>14/169 ( 8.3 )</b>                | <b>11/121 ( 9.1 )</b>      | <b>3/48 ( 6.3 )</b>        | <b>0.759</b>     |
| <b>Diabetes</b>                              | <b>11/169 ( 6.5 )</b>                | <b>10/121 ( 8.3 )</b>      | <b>1/48 ( 2.1 )</b>        | <b>0.183</b>     |
| <b>Malignancy</b>                            | <b>1/169 ( 0.6 )</b>                 | <b>1/121 ( 0.8 )</b>       | <b>0/48 ( 0 )</b>          | <b>1.000</b>     |
| <b>Cerebrovascular<br/>disease</b>           | <b>5/169 ( 3.0 )</b>                 | <b>5/121 ( 4.1 )</b>       | <b>0/48 ( 0 )</b>          | <b>0.323</b>     |
| <b>COPD or chronic<br/>bronchitis</b>        | <b>4/169 ( 2.4 )</b>                 | <b>4/121 ( 3.3 )</b>       | <b>0/48 ( 0 )</b>          | <b>0.579</b>     |
| <b>Others</b>                                | <b>10/169 ( 5.9 )</b>                | <b>9/121 ( 7.4 )</b>       | <b>1/48 ( 2.1 )</b>        | <b>0.285</b>     |
| <b>Laboratory findings-<br/>median (IQR)</b> |                                      |                            |                            |                  |
| <b>SpO<sub>2</sub>-%</b>                     | <b>95.73</b><br><b>( 70–100 )</b>    | <b>95.72 ( 70–100 )</b>    | <b>96 ( 87–100 )</b>       | <b>0.364</b>     |
| <b>Total protein - g/L</b>                   | <b>68.69</b><br><b>( 36.7–98.0 )</b> | <b>66.68 ( 36.7–98.0 )</b> | <b>73.62 ( 54.7–86.3 )</b> | <b>&lt;0.001</b> |
| <b>Albumin - g/L</b>                         | <b>38.8( 18–53.8 )</b>               | <b>37.78 ( 18–53.8 )</b>   | <b>41.19 ( 24.6–53.0 )</b> | <b>0.004</b>     |
| <b>Globulin - g/L</b>                        | <b>29.86</b><br><b>( 9.8–54.5 )</b>  | <b>28.87 ( 9.8–47.2 )</b>  | <b>32.38 ( 23.0–54.5 )</b> | <b>0.002</b>     |
| <b>Total bilirubin -<br/>µmol/L</b>          | <b>12.72</b><br><b>( 2.7–62.0 )</b>  | <b>14.13 ( 5.8–49.2 )</b>  | <b>9.88 ( 2.7–62.0 )</b>   | <b>0.011</b>     |
| <b>ALT-U/L</b>                               | <b>44.62</b>                         | <b>49.98 ( 2.0–547.7 )</b> | <b>30.46 ( 18.0–65.2 )</b> | <b>0.006</b>     |

|                                                    |                        |                          |                     |       |
|----------------------------------------------------|------------------------|--------------------------|---------------------|-------|
|                                                    | ( 2.0–574.7 )          |                          |                     |       |
| AST-U/L                                            | 42.83<br>( 5.0–584.0 ) | 47.79 ( 9.0–584 )        | 29.74 ( 5.0–72.8 )  | 0.007 |
| GGT-U/L                                            | 78.24 ( 7–906 )        | 74.69 ( 7–906 )          | 130.3 ( 9–601 )     | 0.585 |
| Creatinine - $\mu\text{mol/L}$                     | 73.4<br>( 34.5–359 )   | 75.88 ( 39–359 )         | 68.2 ( 34.5–245 )   | 0.276 |
| White blood cell count<br>- $\times 10^9/\text{L}$ | 7.07( 1.01–65 )        | 7.18 ( 1.01–65 )         | 6.77 ( 2.3–19.4 )   | 0.731 |
| Neutrophilcount -<br>$\times 10^9/\text{L}$        | 5.12<br>( 0.52–55.6 )  | 5.17 ( 0.52–55.6 )       | 5 ( 0.8–17.6 )      | 0.862 |
| lymphocyte cell count<br>- $\times 10^9/\text{L}$  | 1.24<br>( 0.18–4.11 )  | 1.26 ( 0.18–4.11 )       | 1.18 ( 0.20–2.40 )  | 0.454 |
| Hemoglobin - g/L                                   | 130.51<br>( 84–230 )   | 130.39 ( 84–230 )        | 131.13 ( 96–219 )   | 0.873 |
| Platelet count - $\times 10^9/\text{L}$            | 222.35<br>( 55–564 )   | 219.12 ( 55–538 )        | 238.78 ( 119–564 )  | 0.328 |
| C-reactive protein -<br>mg/L                       | 33.77<br>( 0.04–285 )  | 31.19<br>( 0.04–254.35 ) | 40.05 ( 0.5–285 )   | 0.316 |
| PCT - $\mu\text{g/mL}$                             | 0.35<br>( 0.02–6.02 )  | 0.37 ( 0.02–6.02 )       | 0.29 ( 0.02–2.94 )  | 0.468 |
| LDH - U/L                                          | 263.16<br>( 120–808 )  | 281.56 ( 120–808 )       | 227.65 ( 151–610 )  | 0.009 |
| Creatine kinase - U/L                              | 107.53<br>( 12–1381 )  | 110.94 ( 28–1381 )       | 101.81 ( 12–355 )   | 0.745 |
| CK-MB - U/L                                        | 13.91 ( 1–73 )         | 13.02 ( 4–45.7 )         | 15.12 ( 1–73 )      | 0.305 |
| PT-s                                               | 14.65<br>( 9.7–100 )   | 15.43 ( 9.7–100 )        | 13.09 ( 10.5–17 )   | 0.081 |
| D-dimer - $\mu\text{g/ml}$                         | 2.16 ( 0–89 )          | 2.7 ( 0–89 )             | 0.76 ( 0.02–20.58 ) | 0.292 |
| Treatment- no./total                               |                        |                          |                     |       |

| <b>no. (%)</b>                |                        |                          |                      |              |
|-------------------------------|------------------------|--------------------------|----------------------|--------------|
| <b>Antiviral</b>              | <b>91/169( 53.85 )</b> | <b>73 ( 60.30 )</b>      | <b>18 ( 37.50 )</b>  | <b>0.007</b> |
| <b>Antibiotics</b>            | <b>154/169</b>         | <b>108 ( 89.30 )</b>     | <b>46 ( 95.80 )</b>  | <b>0.291</b> |
|                               | <b>( 91.10 )</b>       |                          |                      |              |
| <b>Corticosteroids</b>        | <b>48/169( 28.40 )</b> | <b>42 ( 34.70 )</b>      | <b>6 ( 12.50 )</b>   | <b>0.004</b> |
| <b>Outcome- no./total no.</b> |                        |                          |                      | <b>0.561</b> |
| <b>(%)</b>                    |                        |                          |                      |              |
| <b>Improvement</b>            | <b>165/169</b>         | <b>117/121 ( 96.70 )</b> | <b>48/48 ( 100 )</b> |              |
|                               | <b>( 97.60 )</b>       |                          |                      |              |
| <b>Death</b>                  | <b>4/169 ( 2.40 )</b>  | <b>4/121 ( 3.30 )</b>    | <b>0/48 ( 0 )</b>    |              |

364 IQR=interquartile range, COPD=chronic obstructive pulmonary disease, ALT=alanine transaminase,  
 365 AST=aspartate aminotransferase, GGT=gamma glutamyl transferase, PCT=procalcitonin, LDH=lactate  
 366 dehydrogenase, CK-MB=creatinase-MB, PT=prothrombin time

367

368

369

370

371

372

373

374

375

376

377

378

379

380

381

382

383

384

385 **Table2: Clinical features of study subjects according to age group**

|                                                                          | Age –yrs             |                             |                             |                             | p value      |
|--------------------------------------------------------------------------|----------------------|-----------------------------|-----------------------------|-----------------------------|--------------|
|                                                                          | Group A 18–44 (n=52) | Group B 45–64 (n=70)        | Group C 65–74 (n=35)        | Group D ≥75 (n=12)          |              |
| <b>Sex - no./total no.(%)</b>                                            |                      |                             |                             |                             | <b>0.743</b> |
| <b>Male</b>                                                              | 21/52 ( 40.4 )       | 35/70 ( 50.0 )              | 17/35 ( 48.6 )              | 6/12 ( 50.0 )               |              |
| <b>Female</b>                                                            | 31/52 ( 59.6 )       | 35/70 ( 50.0 )              | 18/35 ( 51.4 )              | 6/12 ( 50.0 )               |              |
| <b>Disease severity-<br/>no./total no.(%)</b>                            |                      |                             |                             |                             | <b>0.002</b> |
| <b>Mild</b>                                                              | 8/52 ( 15.4 )        | 3/70 ( 4.2 )                | 1/35 ( 2.9 )                | 0/12 ( 0 )                  | <b>0.077</b> |
| <b>Moderate</b>                                                          | 41/52 ( 78.8 )       | 63/70 ( 90 )                | 24/35 ( 68.6 )              | 9/12(75.0)                  | <b>0.054</b> |
| <b>Severe</b>                                                            | 3/52 ( 5.8 )         | 2/70 ( 2.9 )                | 7/35 ( 20.0 ) <sup>AC</sup> | 1/12(8.3)                   | <b>0.015</b> |
| <b>Critical</b>                                                          | 0/52 ( 0 )           | 2/70 ( 2.9 )                | 3/35 ( 8.5 )                | 2/12(16.7) <sup>AD,BD</sup> | <b>0.020</b> |
| <b>No. of days from illness<br/>onset to admission –<br/>median(IQR)</b> | 8.2 ( 0–32 )         | 14.4 ( 1–40 ) <sup>AB</sup> | 12.3 ( 1–45 ) <sup>AC</sup> | 9.5 ( 0–20 )                | <b>0.009</b> |
| <b>Symptoms - no./total<br/>no.(%)</b>                                   |                      |                             |                             |                             |              |
| <b>Fever</b>                                                             | 34/52 ( 65.4 )       | 60/70 ( 85.7 )              | 27/35 ( 77.1 )              | 9/12 ( 75.0 )               | <b>0.073</b> |
| <b>Dry cough</b>                                                         | 33/52 ( 63.5 )       | 46/70 ( 65.7 )              | 26/35 ( 74.3 )              | 10/12 ( 83.3 )              | <b>0.459</b> |

|                                              |                |                              |                              |                             |        |
|----------------------------------------------|----------------|------------------------------|------------------------------|-----------------------------|--------|
| <b>Sputum production</b>                     | 10/52 ( 19.2 ) | 22/70 ( 31.9 )               | 11/35 ( 31.4 )               | 3/12 ( 25 )                 | 0.43   |
| <b>Shortness of breath</b>                   | 3/52 ( 5.8 )   | 14/70 ( 20.0 ) <sup>AB</sup> | 17/35 ( 48.6 ) <sup>AC</sup> | 4/12 ( 33.3 ) <sup>AD</sup> | <0.001 |
| <b>Myalgia</b>                               | 2/52 ( 3.8 )   | 8/70 ( 22.4 )                | 4/35 ( 11.4 )                | 1/12 ( 8.3 )                | 0.395  |
| <b>Digestive symptoms</b>                    | 9/52 ( 17.3 )  | 11/70 ( 15.7 )               | 7/35 ( 20 )                  | 2/12 ( 16.7 )               | 0.944  |
| <b>Comorbidities - no./total<br/>no.(%)</b>  |                |                              |                              |                             |        |
| <b>Any comorbidity</b>                       | 6/52 ( 11.5 )  | 21/70 ( 30 )                 | 19/35 ( 54.3 )               | 6/12 ( 50.0 )               | <0.001 |
| <b>Hypertension</b>                          | 3/52 ( 5.8 )   | 10/70 ( 14.3 )               | 12/35 ( 34.3 )               | 5/12 ( 41.7 )               | 0.001  |
| <b>Cardiovascular disease</b>                | 2/52 ( 3.8 )   | 7/70 ( 10.0 )                | 5/35 ( 14.3 )                | 0/12 ( 0 )                  | 0.257  |
| <b>Diabetes</b>                              | 0/52 ( 0 )     | 2/70 ( 2.9 )                 | 8/35 ( 22.9 )                | 1/12 ( 8.3 )                | <0.001 |
| <b>Malignancy</b>                            | 0/52 ( 0 )     | 0/70 ( 0 )                   | 1/35 ( 2.9 )                 | 0/12 ( 0 )                  | 0.278  |
| <b>Cerebrovascular disease</b>               | 0/52 ( 0 )     | 0/70 ( 0 )                   | 1/35 ( 2.9 )                 | 4/12 ( 33.3 )               | <0.001 |
| <b>COPD</b>                                  | 0/52 ( 0 )     | 0/70 ( 0 )                   | 3/35 ( 8.5 )                 | 1/12 ( 8.3 )                | 0.006  |
| <b>Others</b>                                | 2/52 ( 3.8 )   | 5/70 ( 7.1 )                 | 2/35 ( 5.7 )                 | 1/12 ( 8.3 )                | 0.825  |
| <b>Laboratory findings-<br/>median (IQR)</b> |                |                              |                              |                             |        |

|                                                 |                    |                                |                                     |                                 |        |
|-------------------------------------------------|--------------------|--------------------------------|-------------------------------------|---------------------------------|--------|
| SpO <sub>2</sub> -%                             | 97.31 ( 93–100 )   | 96.17 ( 70–99 )                | 93.26 ( 76–98 )                     | 93.55 ( 80–98 )                 | 0.032  |
| Total protein - g/L                             | 73 ( 57–86.3 )     | 68.5 ( 36.7–98 ) <sup>AB</sup> | 63.5 ( 53.4–82.2 ) <sup>AC,BC</sup> | 65.7 ( 51–81.8 ) <sup>AD</sup>  | <0.001 |
| Albumin - g/L                                   | 43.3 ( 32.6–53 )   | 38.6 ( 18–53.8 )               | 33.3 ( 20–44.5 )                    | 36.1 ( 27–44 )                  | <0.001 |
| Globulin - g/L                                  | 29.7 ( 22–39.7 )   | 29.9 ( 9.8–47.2 )              | 30 ( 19–54.5 )                      | 29.5 ( 18–41.8 )                | 0.947  |
| Total bilirubin - μmol/L                        | 11.9 ( 2.91–49.2 ) | 11.5 ( 2.8–33 )                | 12.8 ( 2.7–48 )                     | 20.5 ( 5.9–62 )                 | 0.151  |
| ALT-U/L                                         | 45 ( 7–547.7 )     | 50.4 ( 11–479 )                | 32.3 ( 10–81 )                      | 41.5 ( 2–101 )                  | 0.626  |
| AST-U/L                                         | 35.1 ( 9–352.7 )   | 49.2 ( 13–584 )                | 38.1 ( 5–157 )                      | 51.6 ( 20–109.2 )               | 0.540  |
| GGT-U/L                                         | 93.5 ( 10–906 )    | 82.2 ( 8–527 )                 | 72.8 ( 7–601 )                      | 44 ( 7–906 )                    | 0.766  |
| Creatinine - μmol/L                             | 61 ( 34.5–91 )     | 74.2 ( 41–241 )                | 78 ( 46.1–245 )                     | 104.5 ( 60–359 )                | 0.001  |
| White blood cell count -<br>×10 <sup>9</sup> /L | 6.78 ( 2.3–60.9 )  | 7.46 ( 2.34–65 )               | 7.1 ( 1.01–19.4 )                   | 5.9 ( 1.92–13.61 )              | 0.893  |
| Neutrophil count -<br>×10 <sup>9</sup> /L       | 4.76 ( 0.8–55.6 )  | 5.2 ( 1.12–20.71 )             | 5.62 ( 0.52–17.6 )                  | 5.1 ( 1.03–10.66 )              | 0.91   |
| Lymphocyte count -<br>×10 <sup>9</sup> /L       | 1.43(0.43–3.3)     | 1.31(0.23–4.11)                | 0.94(0.18–2.2) <sup>AC,BC</sup>     | 0.85(0.2–2.07) <sup>AD,BD</sup> | 0.001  |
| Hemoglobin - g/L                                | 137.47 ( 102–230 ) | 131.48 ( 100–191 )             | 123.5 ( 84–177 )                    | 114.72 ( 87–147 )               | 0.001  |
| Platelet count - ×10 <sup>9</sup> /L            | 218.5 ( 55–431 )   | 225.73 ( 84–564 )              | 243 ( 100–538 )                     | 167.36 ( 85–250 )               | 0.108  |



|                                  |                      |                                  |                                 |                                       |        |
|----------------------------------|----------------------|----------------------------------|---------------------------------|---------------------------------------|--------|
| C-reactive protein - mg/L        | 17.76 ( 0.04–78.95 ) | 30.11 ( 0.4–149.68 )             | 46.84 ( 0.4–285 )               | 88.57 ( 1–254.35 )                    | 0.006  |
| PCT -µg/mL                       | 0.21 ( 0.02–0.67 )   | 0.34 ( 0.04–2.57 )               | 0.49 ( 0.03–6.02 )              | 0.56 ( 0.08–2.05 )                    | 0.017  |
| LDH - U/L                        | 212.86 ( 120–681 )   | 275.74 ( 123–686 ) <sup>AB</sup> | 282.2 ( 175–544 ) <sup>AC</sup> | 369.09 ( 177–808 ) <sup>AD</sup>      | <0.001 |
| Creatinekinase - U/L             | 117.42 ( 31.4–1381 ) | 101.87 ( 28–355 )                | 88.87 ( 12–216 )                | 120.6 ( 43–600 )                      | 0.891  |
| CK-MB - U/L                      | 14.09 ( 5–68 )       | 12.75 ( 4–45.7 )                 | 17.34 ( 6–73 )                  | 16.52 ( 5–32.26 )                     | 0.405  |
| PT-s                             | 0.24 ( 0.01–1.23 )   | 0.88 ( 0–7.8 )                   | 4.23 ( 0.02–80 )                | 10.66 ( 0.18–89 ) <sup>AD,BD,CD</sup> | <0.001 |
| D-dimer - µg/ml                  | 13.16 ( 9.7–15.8 )   | 13.37 ( 9.7–29.3 )               | 15.57 ( 10.9–76 )               | 21.87 ( 12.6–100 ) <sup>AD,BD</sup>   | 0.001  |
| <b>Immunology – median (IQR)</b> |                      |                                  |                                 |                                       |        |
| IgG- g/L                         | 11.53 ( 7.84–15.16 ) | 13.39 ( 7.42–20.81 )             | 12.66 ( 7.96–16.69 )            | 12.75 ( 7.24–19.18 )                  | 0.647  |
| IgA- g/L                         | 2.15 ( 1.32–3.44 )   | 2.63 ( 1.37–5.09 )               | 2.07 ( 1.47–3.34 )              | 2.65 ( 2.38–4.71 )                    | 0.26   |
| IgM- g/L                         | 1.42 ( 0.64–2.29 )   | 1.53 ( 0.64–3.15 )               | 1.37 ( 0.82–2.55 )              | 1.18 ( 0.38–2.49 )                    | 0.662  |
| IgE- g/L                         | 74.77 ( 2.4–480.1 )  | 124.38 ( 1.3–1100 )              | 32.85 ( 0.8–76.1 )              | 154.15 ( 2.8–1008 )                   | 0.717  |
| IL-6- pg/mL                      | 1.69 ( 15–2.84 )     | 6.76 ( 1.5–42.53 )               | 33.57 ( 1.5–223.81 )            | 71.34 ( 2.89–252.7 )                  | 0.007  |
| C3- g/L                          | 0.94 ( 0.8–1.3 )     | 0.94 ( 0.6–1.3 )                 | 0.85 ( 0.8–1 )                  | 0.94 ( 0.6–1.4 )                      | 0.701  |

|                                                                 |                     |                       |                       |                  |       |
|-----------------------------------------------------------------|---------------------|-----------------------|-----------------------|------------------|-------|
| C4- g/L                                                         | 0.199 ( 0.1–0.4 )   | 0.18 ( 0.1–0.3 )      | 0.18 ( 0.1–0.2 )      | 0.22 ( 0.1–0.4 ) | 0.61  |
| CD3+ cell count - cell/ $\mu$ l                                 | 1057.83 ( 243–1736) | 785.66(377–1357)      | 577.28(142–1310)      | –                | 0.015 |
| CD4+ cell count - cell/ $\mu$ l                                 | 666.77(79–1320)     | 520.5(207–1000)       | 402.57(79–883)        | –                | 0.081 |
| CD8+ cell count - cell/ $\mu$ l                                 | 391.05(107–892)     | 265.16(75–548)        | 174.71(58–427)        | –                | 0.011 |
| CD4+ cell percentage<br>- %                                     | –                   | 45.87 ( 42.32–50.93 ) | 39.85 ( 10.83–59.3 )  | 31.23            | 0.546 |
| CD8+ cell percentage<br>- %                                     | –                   | 24.77 ( 22.08–28.67 ) | 26.18 ( 14.67–46.04 ) | 15.54            | 0.436 |
| CD3+ cell percentage<br>- %                                     | –                   | 72.84 ( 70.68–74.79 ) | 68.87 ( 58.64–86.66 ) | 47.77            | 0.195 |
| NK cell percentage - %                                          | –                   | 5.18 ( 3.54–6.47 )    | 11.71 ( 2.69–27.59 )  | 7.64             | 0.346 |
| <b>Number of lung lobes<br/>involved - no./total<br/>no.(%)</b> |                     |                       |                       |                  |       |
| 5                                                               | 12/45 ( 26.7 )      | 29/48 ( 60.4 )        | 16/25 ( 64.0 )        | 5/10 ( 50.0 )    | 0.003 |
| 4                                                               | 2/45 ( 4.5 )        | 7/48 ( 14.6 )         | 2/25 ( 8.0 )          | 0/10 ( 0 )       | 0.336 |
| 3                                                               | 3/45 ( 6.7 )        | 4/48 ( 8.3 )          | 4/25 ( 16.0 )         | 4/10 ( 4.0 )     | 0.032 |
| 2                                                               | 11/45 ( 24.4 )      | 4/48 ( 8.3 )          | 2/25 ( 8.0 )          | 0/10 ( 0 )       | 0.073 |
| 1                                                               | 11/45 ( 24.4 )      | 2/48 ( 4.2 )          | 0/25 ( 0 )            | 1/10 ( 10.0 )    | 0.003 |

|                                         |                        |                       |                       |                       |              |
|-----------------------------------------|------------------------|-----------------------|-----------------------|-----------------------|--------------|
| <b>0</b>                                | <b>6/45 ( 13.3 )</b>   | <b>2/48 ( 4.2 )</b>   | <b>1/25 ( 4.0 )</b>   | <b>0/10 ( 0 )</b>     | <b>0.343</b> |
| <b>Treatment - no./total<br/>no.(%)</b> |                        |                       |                       |                       |              |
| <b>Antiviral</b>                        | <b>21/52 ( 40.4 )</b>  | <b>39/70 ( 55.7 )</b> | <b>25/35 ( 71.4 )</b> | <b>6/12 ( 50.0 )</b>  | <b>0.047</b> |
| <b>Antibiotics</b>                      | <b>48/52 ( 92.3 )</b>  | <b>66/70 ( 94.3 )</b> | <b>32/35 ( 91.4 )</b> | <b>8/12 ( 66.7 )</b>  | <b>0.001</b> |
| <b>Corticosteroids</b>                  | <b>6/52 ( 11.5 )</b>   | <b>19/70 ( 27.1 )</b> | <b>18/35 ( 51.4 )</b> | <b>0/12 ( 0 )</b>     | <b>0.001</b> |
| <b>Prognosis - no./total<br/>no.(%)</b> |                        |                       |                       |                       | <b>0.24</b>  |
| <b>Death</b>                            | <b>0/52 ( 0 )</b>      | <b>2/70 ( 2.9 )</b>   | <b>1/35 ( 2.9 )</b>   | <b>1/12 ( 8.3 )</b>   |              |
| <b>improve</b>                          | <b>52/52 ( 100.0 )</b> | <b>68/70 ( 97.1 )</b> | <b>34/35 ( 97.1 )</b> | <b>11/12 ( 91.7 )</b> |              |

386 IQR=interquartile range, COPD=chronic obstructive pulmonary disease, ALT=alanine transaminase, AST=aspartate aminotransferase, GGT=gamma glutamyl  
 387 transferase, PCT=procalcitonin, LDH=lactate dehydrogenase, CK-MB=creatin kinase-MB, PT=prothrombin time, Ig=immunoglobulin, IL=interleukin,  
 388 C3=complement 3, C4=complement 4, CD=cluster of differentiation, NK= natural killer  
 389 Comparison between groups (P<0.05):AB= A compared with B, AC= A compared with C, AD=A compared with D, BC=B compared with C, BD=B compared with  
 390 D, CD=C compared with D.  
 391  
 392  
 393  
 394  
 395

396 **Table 3. Features of study subjects based on presence of comorbidities**

|                                                                                           | <b>Have comorbidities</b><br>( N=52 ) | <b>Have no comorbidities</b><br>( N=117 ) | <b>p value</b> |
|-------------------------------------------------------------------------------------------|---------------------------------------|-------------------------------------------|----------------|
| <b>Disease severity-<br/>no./total no.(%)</b>                                             |                                       |                                           | <b>0.004</b>   |
| <b>Mild</b>                                                                               | 1/52 ( 1.9 )                          | 11/117 ( 9.4 )                            | <b>0.108</b>   |
| <b>Moderate</b>                                                                           | 40/52 ( 76.9 )                        | 97/117 ( 82.9 )                           | <b>0.360</b>   |
| <b>Severe</b>                                                                             | 5/52 ( 9.6 )                          | 8/117 ( 6.8 )                             | <b>0.542</b>   |
| <b>Critical</b>                                                                           | 6/52 ( 11.6 )                         | 1/117 ( 0.9 )                             | <b>0.004</b>   |
| <b>Sex - no./total no.(%)</b>                                                             |                                       |                                           | <b>0.368</b>   |
| <b>Male</b>                                                                               | 27/52 ( 51.9 )                        | 52/117 ( 44.4 )                           | -              |
| <b>Female</b>                                                                             | 25/52 ( 48.1 )                        | 65/117 ( 55.6 )                           | -              |
| <b>Age in yrs- median<br/>(IQR)</b>                                                       | 59.88 ( 25–86 )                       | 48.69 ( 18–92 )                           | <b>0.001</b>   |
| <b>Days from onset of<br/>illness to confirmation<br/>of diagnosis -<br/>median (IQR)</b> | 11.18 ( 0–40 )                        | 11.86 ( 0–45 )                            | <b>0.691</b>   |
| <b>Symptoms - no./total<br/>no.(%)</b>                                                    |                                       |                                           |                |
| <b>Fever</b>                                                                              | 43/52 ( 82.7 )                        | 87/117 ( 74.4 )                           | <b>0.235</b>   |
| <b>Dry cough</b>                                                                          | 39/52 ( 75.0 )                        | 76/117 ( 68.0 )                           | <b>0.196</b>   |
| <b>Sputum production</b>                                                                  | 17/52 ( 33.3 )                        | 29/117 ( 24.8 )                           | <b>0.253</b>   |
| <b>Shortness of breath</b>                                                                | 19/52 ( 36.5 )                        | 19/117 ( 16.2 )                           | <b>0.004</b>   |
| <b>Digestive symptoms</b>                                                                 | 6/52 ( 11.5 )                         | 9/117 ( 7.7 )                             | <b>0.604</b>   |
| <b>Myalgia</b>                                                                            | 9/52 ( 17.6 )                         | 20/117 ( 17.1 )                           | <b>0.931</b>   |
| <b>Laboratory<br/>findings-median (IQR)</b>                                               |                                       |                                           |                |
| <b>SpO<sub>2</sub>- %</b>                                                                 | 94.4 ( 70–99 )                        | 96.3 ( 72–100 )                           | <b>0.121</b>   |

|                                                       |                             |                           |              |
|-------------------------------------------------------|-----------------------------|---------------------------|--------------|
| <b>Total protein - g/L</b>                            | <b>65.66 ( 39–84 )</b>      | <b>70.06 ( 36.7–98 )</b>  | <b>0.004</b> |
| <b>Albumin - g/L</b>                                  | <b>36.34 ( 18–53 )</b>      | <b>39.9 ( 20–53.8 )</b>   | <b>0.002</b> |
| <b>Globulin - g/L</b>                                 | <b>29.28 ( 18–47.2 )</b>    | <b>30.12 ( 9.8–54.5 )</b> | <b>0.458</b> |
| <b>Total bilirubin -<br/>µmol/L</b>                   | <b>16.65 ( 4.3–62 )</b>     | <b>10.91 ( 2.7–49.2 )</b> | <b>0.006</b> |
| <b>ALT-U/L</b>                                        | <b>33.96 ( 2–120 )</b>      | <b>49.32 ( 10–574.7 )</b> | <b>0.046</b> |
| <b>AST-U/L</b>                                        | <b>38.94 ( 5–207 )</b>      | <b>44.54 ( 9–584 )</b>    | <b>0.476</b> |
| <b>GGT-U/L</b>                                        | <b>71.33 ( 10–601 )</b>     | <b>81.99 ( 7–906 )</b>    | <b>0.706</b> |
| <b>Creatinine - µmol/L</b>                            | <b>81.69 ( 43–359 )</b>     | <b>69.45 ( 34.5–241 )</b> | <b>0.177</b> |
| <b>White blood cell count<br/>- ×10<sup>9</sup>/L</b> | <b>7.74 ( 1.01–65 )</b>     | <b>6.77 ( 1.92–60.9 )</b> | <b>0.404</b> |
| <b>Neutrophil count -<br/>×10<sup>9</sup>/L</b>       | <b>5.44 ( 0.52–20.71 )</b>  | <b>4.96 ( 0.8–55.6 )</b>  | <b>0.646</b> |
| <b>Lymphocyte count -<br/>×10<sup>9</sup>/L</b>       | <b>1.07 ( 0.18–2.66 )</b>   | <b>1.31 ( 0.26–4.11 )</b> | <b>0.032</b> |
| <b>Hemoglobin - g/L</b>                               | <b>127.95 ( 84–191 )</b>    | <b>131.57 ( 100–230 )</b> | <b>0.331</b> |
| <b>Platelet count - ×10<sup>9</sup>/L</b>             | <b>213.34 ( 85–392 )</b>    | <b>226.73 ( 55–564 )</b>  | <b>0.292</b> |
| <b>C-reactive protein -<br/>mg/L</b>                  | <b>49.72 ( 0.3–254.35 )</b> | <b>27.22 ( 0.04–285 )</b> | <b>0.026</b> |
| <b>PCT -µg/mL</b>                                     | <b>0.53 ( 0.02–6.02 )</b>   | <b>0.27 ( 0.02–1.74 )</b> | <b>0.091</b> |
| <b>ESR - mm/h</b>                                     | <b>44.67 ( 20–97.3 )</b>    | <b>37.62 ( 9–119 )</b>    | <b>0.175</b> |
| <b>LDH - U/L</b>                                      | <b>327.21 ( 123–808 )</b>   | <b>235.51 ( 120–681 )</b> | <b>0.002</b> |
| <b>Creatinekinase - U/L</b>                           | <b>106.45 ( 12–600 )</b>    | <b>107.91 ( 28–1381 )</b> | <b>0.961</b> |
| <b>CK-MB - U/L</b>                                    | <b>16.37 ( 5–73 )</b>       | <b>12.68 ( 1–45.7 )</b>   | <b>0.181</b> |
| <b>D-dimer -µg/ml</b>                                 | <b>3.33 ( 0–80 )</b>        | <b>0.71 ( 0.01–8.00 )</b> | <b>0.175</b> |
| <b>PT-s</b>                                           | <b>18.18 ( 10.9–100 )</b>   | <b>13.22 ( 9.7–17.4 )</b> | <b>0.101</b> |
| <b>Immunological<br/>findings- median (IQR)</b>       |                             |                           |              |

|                                                           |                       |                       |       |
|-----------------------------------------------------------|-----------------------|-----------------------|-------|
| IgG- g/L                                                  | 2.32 ( 1.37–3.54 )    | 2.46 ( 1.32–5.09 )    | 0.625 |
| IgA- g/L                                                  | 1.43 ( 0.46–2.98 )    | 1.37 ( 0.38–3.15 )    | 0.785 |
| IgM- g/L                                                  | 120.19 ( 0.8–1100 )   | 99.05 ( 1.3–1008 )    | 0.770 |
| IgE- g/L                                                  | 11.5 ( 7.24–16.88 )   | 13.03 ( 7.42–20.81 )  | 0.229 |
| C3- g/L                                                   | 0.91 ( 0.6–1.2 )      | 0.93 ( 0.6–1.4 )      | 0.719 |
| C4- g/L                                                   | 0.18 ( 0.1–0.3 )      | 0.2 ( 0.1–0.4 )       | 0.433 |
| IL-6- pg/mL                                               | 17.67 ( 1.5–124.8 )   | 23.42 ( 0–252.7 )     | 0.773 |
| CD3+ cell count -<br>cell/μl                              | 65.6 ( 58.64–75.45 )  | 69.59 ( 47.77–86.66 ) | 0.487 |
| CD4+ cell count -<br>cell/μl                              | 12.48 ( 2.69–27.59 )  | 8.9 ( 3.54–18.76 )    | 0.379 |
| CD8+ cell counts -<br>cell/μl                             | 14.99 ( 1.8–37.85 )   | 17.61 ( 3.3–37.33 )   | 0.673 |
| CD4+ cell percentage<br>- %                               | 36.61 ( 10.83–59.3 )  | 42.41 ( 31.23–55 )    | 0.376 |
| CD8+ cell percentage<br>- %                               | 26.85 ( 14.67–46.04 ) | 28.8 ( 15.54–73.05 )  | 0.816 |
| Days before negative<br>nucleic acid<br>test-median (IQR) | 8.18 ( 2–30 )         | 6.16 ( 1–18 )         | 0.092 |
| Treatment - no./total<br>no. (%)                          |                       |                       |       |
| Antibiotics                                               | 33/52 ( 63.50 )       | 58/117 ( 49.6 )       | 0.095 |
| Antiviral                                                 | 49/52 ( 94.2 )        | 105/117 ( 89.7 )      | 0.558 |
| Corticosteroids                                           | 16/52 ( 30.8 )        | 32/117 ( 27.4 )       | 0.649 |
| Outcome - no./total no.<br>(%)                            |                       |                       | 0.008 |
| Death                                                     | 4/52 ( 7.7 )          | 0/117 ( 0 )           |       |
| Improvement                                               | 48/52 ( 92.3 )        | 117/117 ( 100 )       |       |

397 IQR=interquartile range, ALT=alanine transaminase, AST=aspartate aminotransferase, GGT=gamma  
398 glutamyl transferase, PCT=procalcitonin, LDH=lactate dehydrogenase, CK-MB=creatin kinase-MB,  
399 ESR=erythrocyte sedimentation rate, PT=prothrombin time, Ig=immunoglobulin

400

401

402 Table 4:Relationship between age and disease severity ( N=169 )

| Variable                        | B      | Wald $\chi^2$ | P     | 95%CI             |
|---------------------------------|--------|---------------|-------|-------------------|
| Q1                              | -4.604 | 32.983        | 0.000 | ( -6.175~-3.033 ) |
| Q2                              | 0.512  | 0.586         | 0.444 | ( -0.799~1.823 )  |
| Q3                              | 1.770  | 6.063         | 0.014 | ( 0.361~3.180 )   |
| Age group<br>(control: group 5) |        |               |       |                   |
| 1                               | -2.675 | 8.098         | 0.004 | ( -4.518~-0.883 ) |
| 2                               | -2.382 | 8.146         | 0.004 | ( -4.017~-0.746 ) |
| 3                               | -1.768 | 5.022         | 0.025 | ( -3.314~-0.222 ) |
| 4                               | -0.628 | 0.691         | 0.406 | ( -2.110~0.853 )  |

403 Q1=Mild disease, Q2=Moderate disease, Q3=Severe disease, Q4=Critical disease

404 Age group (years, 15-year intervals): 1=18–32, 2=33–47, 3=48–62, 4=63–77, 5=78–92; B=regression

405 coefficient; OR=odds ratio; 95%CI=95% confidence interval

406

407 Table 5:Univariable and multivariable analyses of risk factors for disease severity ( N=169 )

| Variable                                      | Univariable analysis |       | Multivariable analysis |               |  |
|-----------------------------------------------|----------------------|-------|------------------------|---------------|--|
|                                               | P                    | P     | OR                     | 95%CI         |  |
| SpO <sub>2</sub> (%)                          | 0.000                | 0.000 | 0.693                  | (0.572–0.839) |  |
| Age(Year)                                     | 0.003                | 0.482 | -                      | -             |  |
| Lymphocytes( $\times 10^9/L$ )                | 0.000                | 0.047 | 0.176                  | (0.032–0.976) |  |
| CRP rise(No)                                  | 0.003                | 0.212 | -                      | -             |  |
| LDH rise(No)                                  | 0.002                | 0.974 | -                      | -             |  |
| Administration of corticosteroids             | 0.000                | 0.505 | -                      | -             |  |
| Days from onset of illness to confirmation of | 0.049                | 0.070 | -                      | -             |  |

| diagnosis time               |       |       |       |               |
|------------------------------|-------|-------|-------|---------------|
| Underlying disease(No)       | 0.043 | 0.185 | -     |               |
| Albumin (g/L)                | 0.002 | -     | -     | -             |
| D-dimer ( $\mu\text{g/ml}$ ) | 0.019 | 0.307 | 1.056 | (0.951–1.171) |
| Dyspnea(No)                  | 0.000 | 0.270 | -     | -             |
| Cough(No)                    | 0.032 | -     | -     | -             |

408 LDH=lactate dehydrogenase; CRP=C-reactive protein; OR=odds ratio; 95%CI=95% confidence interval

409

410

411

412

413

414

415

416

417

418

419



**Table6: Chest CT findings of study subjects on different days\***

|                                                     | On admission        | Group1(≤7 days)    | Group2(8–14 days)   | Group3(15–21days)    | Group4(22–28days)    | Group5(29–45 days)   | Group6(46–60days)    | p value |
|-----------------------------------------------------|---------------------|--------------------|---------------------|----------------------|----------------------|----------------------|----------------------|---------|
| Number of patients                                  | 116                 | 59                 | 92                  | 109                  | 60                   | 52                   | 18                   |         |
| Days from onset of illness to chest CT-median (IQR) | 10.73±7.97 ( 0-34 ) | 4.610±2.14 ( 0-7 ) | 11.09±1.93 ( 8-14 ) | 17.72±2.01 ( 15-21 ) | 24.98±1.92 ( 22-28 ) | 34.58±5.18 ( 29-45 ) | 51.72±3.64 ( 45-57 ) |         |
| Bilateral lung involvement - no./total no.(%)       | 84/116 ( 72.4 )     | 39/59 ( 66.1 )     | 68/92 ( 73.9 )      | 87/109 ( 79.8 )      | 51/60 ( 85 )         | 39/52 ( 75 )         | 12/18 ( 66.7 )       | 0.158   |
| Distribution of lesions in lung-no./total no.(%)    |                     |                    |                     |                      |                      |                      |                      |         |
| Peripheral                                          | 88/116( 75.86 )     | 41/59 ( 69.49 )    | 72/92 ( 78.26 )     | 92/109 ( 84.40 )     | 55/60 ( 91.67 )      | 47/52 ( 90.38 )      | 17/18 ( 94.44 )      | 0.006   |
| Along the bronchi                                   | 30/116( 25.86 )     | 10/59 ( 16.95 )    | 32/92 ( 34.78 )     | 33/109 ( 30.28 )     | 12/60 ( 20.00 )      | 11/52 ( 21.15 )      | 2/18 ( 11.11 )       | 0.049   |
| Random                                              | 3/116 ( 2.59 )      | 4/59 ( 6.78 )      | 2/92 ( 2.17 )       | 1/109 ( 0.92 )       | 0/60 ( 0 )           | 0/52 ( 0 )           | 0/18 ( 0 )           | 0.101   |
| Diffuse                                             | 11/116 ( 9.48 )     | 4/59 ( 6.78 )      | 6/92 ( 6.52 )       | 9/109 ( 8.26 )       | 2/60 ( 3.33 )        | 1/52 ( 1.92 )        | 1/18 ( 5.56 )        | 0.638   |
| CT                                                  |                     |                    |                     |                      |                      |                      |                      |         |

| <b>findings-no./total no.(%)</b>                      |                 |                 |                 |                  |                 |                 |                 |         |
|-------------------------------------------------------|-----------------|-----------------|-----------------|------------------|-----------------|-----------------|-----------------|---------|
| <b>Ground-glass opacity</b>                           | 64/116(55.2)    | 48/59(81.4)     | 48/92(52.2)     | 41/109(37.6)     | 17/60(28.3)     | 19/52(36.5)     | 8/18(44.4)      | 0.001#  |
| <b>Consolidation</b>                                  | 77/116(66.4)    | 30/59(50.9)     | 72/92(78.3)     | 80/109(73.4)     | 37/60(61.7)     | 33/55(63.6)     | 14/18(77.8)     | 0.004@  |
| <b>Ground-glass opacity with consolidation</b>        | 39/116(33.6)    | 16/59(27.1)     | 31/92(33.7)     | 34/109(31.2)     | 12/60(20.0)     | 16/55(29.1)     | 6/18(33.3)      | 0.337   |
| <b>Linear opacity</b>                                 | 64/116(55.2)    | 20/59(33.9)     | 53/92(57.6)     | 91/109(83.5)     | 56/60(93.3)     | 51/52(98.1)     | 18/18(100)      | 0.001   |
| <b>Reticular change</b>                               | 15/116( 12.93 ) | 4/59(6.78)      | 5/92 ( 5.43 )   | 18/109 ( 16.51 ) | 13/60 ( 21.67 ) | 13/52 ( 25.00 ) | 7/18 ( 38.89 )  | 0.001 ¥ |
| <b>Pleural thickening</b>                             | 6/116 ( 5.17 )  | 0/59 ( 0 )      | 3/92 ( 3.26 )   | 9/109 ( 8.26 )   | 7/60 ( 11.67 )  | 9/52 ( 17.31 )  | 3/18 ( 16.67 )  | 0.001   |
| <b>Pleural effusion</b>                               | 2/116 ( 1.72 )  | 1/59 ( 1.69 )   | 0/92 ( 0 )      | 2/109 ( 1.83 )   | 1/60 ( 1.67 )   | 1/52 ( 1.92 )   | 0/18 ( 0 )      | 0.753   |
| <b>Vascular thickening</b>                            | 40/116( 34.48 ) | 12/59 ( 20.34 ) | 28/92 ( 30.43 ) | 47/109 ( 43.12 ) | 25/60 ( 41.67 ) | 32/52 ( 61.54 ) | 6/18 ( 33.33 )  | 0.001   |
| <b>Number of lung lobes involved-no./total no.(%)</b> |                 |                 |                 |                  |                 |                 |                 |         |
| <b>5</b>                                              | 56/116( 48.28 ) | 20/59 ( 33.90 ) | 43/92 ( 46.74 ) | 58/109 ( 53.21 ) | 33/60 ( 55.00 ) | 28/52 ( 53.85 ) | 12/18 ( 66.67 ) | 0.079   |

|   |                 |           |           |           |                 |           |            |       |
|---|-----------------|-----------|-----------|-----------|-----------------|-----------|------------|-------|
|   |                 | 6/59      | 7/92      | 14/109    |                 | 7/52      |            |       |
| 4 | 10/116( 8.662 ) | ( 10.17 ) | ( 7.61 )  | ( 12.84 ) | 6/60 ( 10.00 )  | ( 13.46 ) | 0/18 ( 0 ) | 0.530 |
|   |                 | 10/59     | 11/92     | 9/109     | 4/60            | 11/52     | 6/18       |       |
| 3 | 16/116( 13.79 ) | ( 16.95 ) | ( 11.96 ) | ( 8.26 )  | ( 6.67 )        | ( 21.15 ) | ( 33.33 )  | 0.011 |
|   |                 | 12/59     | 20/92     | 18/109    |                 | 4/52      |            |       |
| 2 | 17/116( 14.66 ) | ( 20.34 ) | ( 21.74 ) | ( 16.51 ) | 12/60 ( 20.00 ) | ( 7.69 )  | 0/18 ( 0 ) | 0.100 |
|   |                 | 11/59     | 11/92     | 10/109    | 5/60            | 2/52      |            |       |
| 1 | 17/116( 14.66 ) | ( 18.64 ) | ( 11.96 ) | ( 9.17 )  | ( 8.33 )        | ( 3.85 )  | 0/18 ( 0 ) | 0.083 |

\* Days from onset of illness to chest CT examination

CT=computed tomography, IQR=interquartile range

#: Group1 compared to other groups; Group2 compared to Group3 and Group4; p<0.05

@: Group1 compared toGroup2, Group3, and Group4; Group2 compared toGroup5; p<0.05

¥ : Group1 compared to other groups; Group2 compared to other groups; p<0.05



Table 7: Univariable and multivariable analysis of factors associated with the time it takes for nucleic acid test to turn negative (N=79 )

| Variable                       | Univariable analysis | Multivariable analysis |        |                 |
|--------------------------------|----------------------|------------------------|--------|-----------------|
|                                | P                    | P                      | B      | 95%CI           |
| Sex(Male)                      | 0.079                | -                      | -      | -               |
| Age(Year)                      | 0.278                | -                      | -      | -               |
| Lymphocytes( $\times 10^9/L$ ) | 0.005                | 0.014                  | -2.974 | (-5.327~-0.620) |
| CRP(mg/L)                      | 0.021                | 0.954                  | 0.001  | (-0.022~-0.024) |
| LDH(U/L)                       | 0.005                | 0.730                  | 0.003  | (-0.012~-0.017) |
| Corticosteroids                | 0.005                | 0.137                  | -1.710 | (-3.978~-0.557) |
| Antibiotics                    | 0.024                | 0.154                  | -1.563 | (-3.723~-0.598) |

LDH=lactate dehydrogenase; CRP=C-reactive protein; B=Regression coefficients; 95%CI=95% confidence interval

Table 8: Univariable and multivariable analysis of factors associated with the time it takes for symptoms to improve ( N=53 )

| Variable                                                       | Univariable analysis | Multivariable analysis |       |                 |
|----------------------------------------------------------------|----------------------|------------------------|-------|-----------------|
|                                                                | P                    | P                      | B     | 95%CI           |
| Sex(Male)                                                      | 0.724                | -                      | -     | -               |
| Age(Year)                                                      | 0.052                | 0.095                  | 0.146 | (-0.025~-0.319) |
| Lymphocytes( $\times 10^9/L$ )                                 | 0.029                | 0.440                  | 1.713 | (-2.708~-6.134) |
| CRP(mg/L)                                                      | 0.993                | -                      | -     | -               |
| LDH( $\mu/L$ )                                                 | 0.792                | -                      | -     | -               |
| Administration of corticosteroid                               | 0.323                | -                      | -     | -               |
| Time from onset of illness to confirmation of diagnosis (days) | 0.000                | 0.001                  | 0.527 | (0.219~0.835)   |

LDH=lactate dehydrogenase; CRP=C-reactive protein; B=Regression coefficients; 95%CI=95% confidence interval

Table 9: Univariable and multivariable analysis of factors associated with chest CT improvement( N=62 )

| Variable                                                       | Univariable analysis | Multivariable analysis |       |               |
|----------------------------------------------------------------|----------------------|------------------------|-------|---------------|
|                                                                | P                    | P                      | HR    | 95%CI         |
| Sex(Male)                                                      | 0.023                | 0.109                  | 0.608 | (0.331–1.117) |
| Age(Year)                                                      | 0.195                | -                      | -     | -             |
| Lymphocytes( $\times 10^9/L$ )                                 | 0.088                | 0.278                  | 1.374 | (0.774–2.440) |
| CRP(mg/L)                                                      | 0.561                | -                      | -     | -             |
| LDH(U/L)                                                       | 0.899                | -                      | -     | -             |
| Administration of corticosteroid                               | 0.540                | -                      | -     | -             |
| Time from onset of illness to confirmation of diagnosis (days) | 0.075                | 0.013                  | 1.019 | (1.019–1.168) |
| Disease severity                                               | 0.045                | 0.061                  | -     | -             |
| Moderate(compared to mild mild)                                | -                    | 0.008                  | 0.261 | (0.097–0.704) |
| Severe(compared to mild mild)                                  | -                    | 0.057                  | 0.192 | (0.035–1.049) |
| Critical(compared to mild mild)                                | -                    | 0.971                  | 0     | 0             |
| Time of onset to nucleic acid positive time(days)              | 0.059                | 0.853                  | 1.009 | (0.918–1.110) |

CT=computed tomography, LDH=lactate dehydrogenase, CRP=C-reactive protein, HR=hazard ratio, 95%CI=95% confidence interval

## Figure legends

**Figure 1** : Computed tomography findings in the lungs on different days in the course of the disease in a patient with severe disease.(a)4 days from onset of illness.(b)8 days from illness onset ( patient’s clinical symptoms began to improve ) .(c)13 days from onset of illness. (d)18 days from onset of illness. (e)23 days from onset of illness onset.

**Figure 2:** Computed tomography findings in the lungs on different days in the course

of the disease in a patient with moderate disease. (a)5 days from onset of illness. (b)10 days from onset of illness (patient's clinical symptoms began to improve). (c)15 days from onset of illness. (d)21 days from onset of illness.

**Figure 3:** Correlations between: The days of nucleic acid test turned negative and lymphocytes;

**Figure 4:** Correlations between: Time from onset of symptoms to confirmation of diagnosis and Time it took for symptoms to improve.

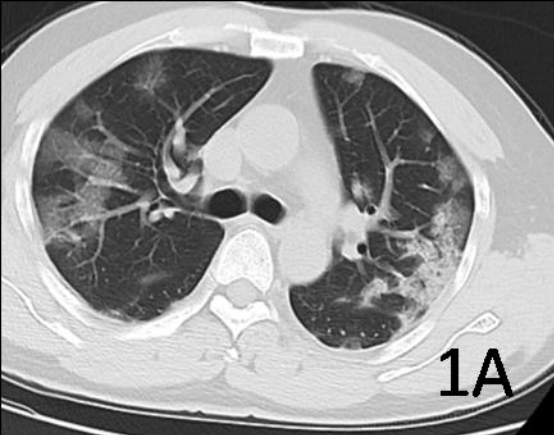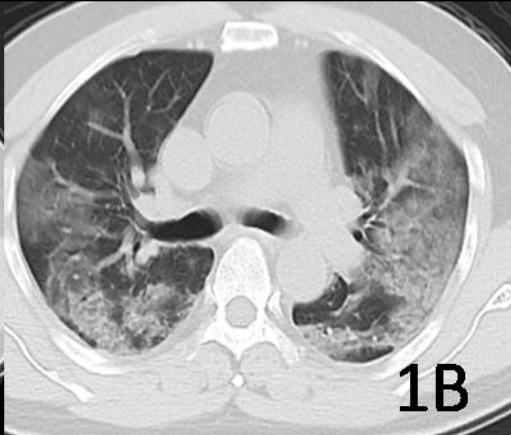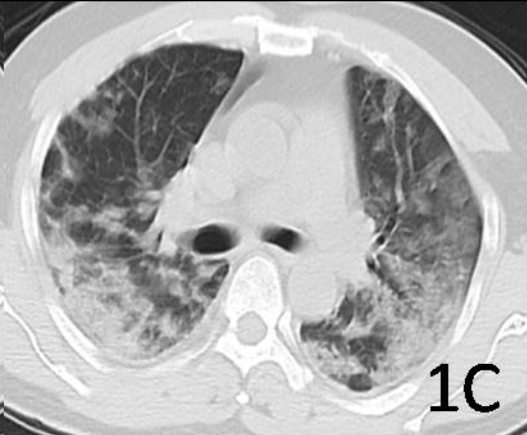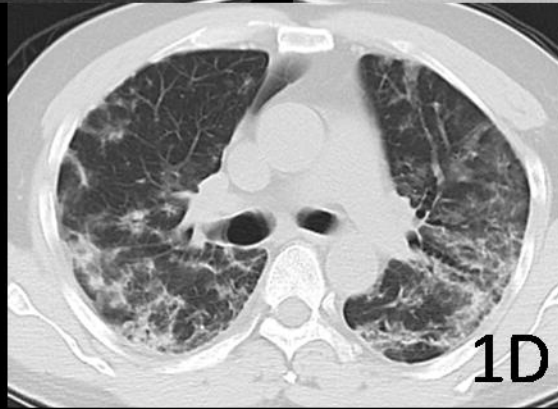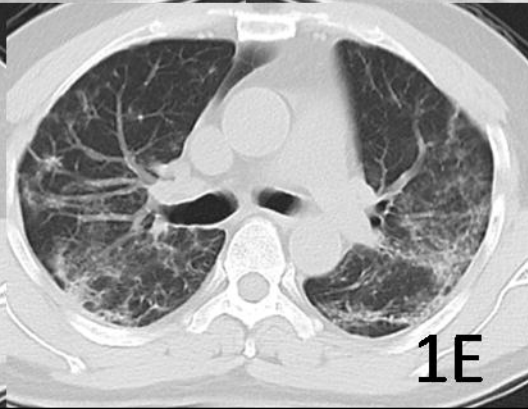



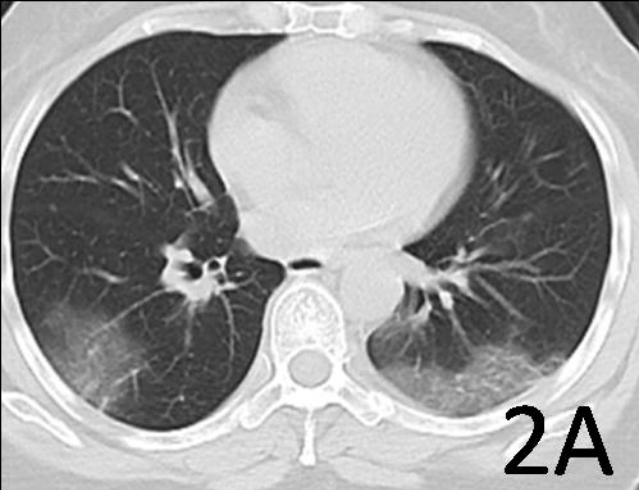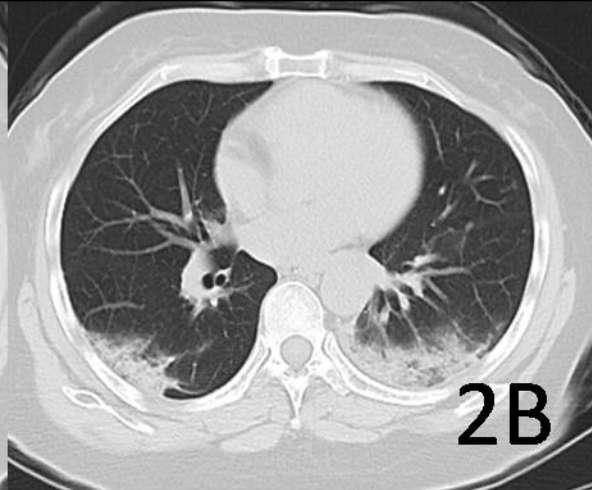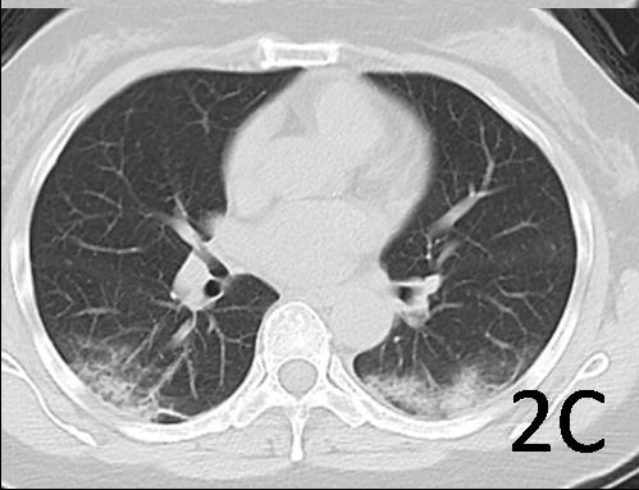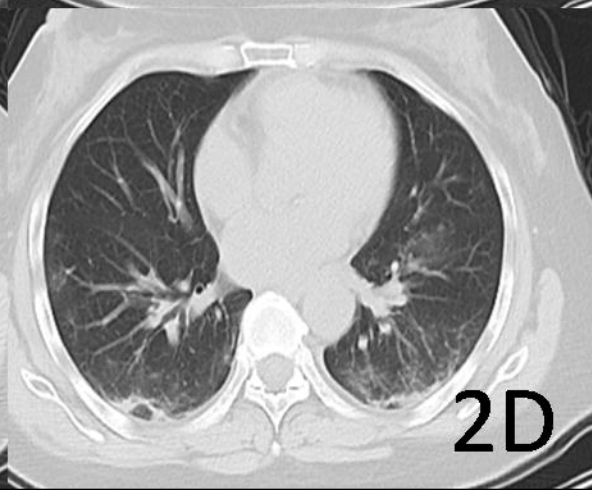

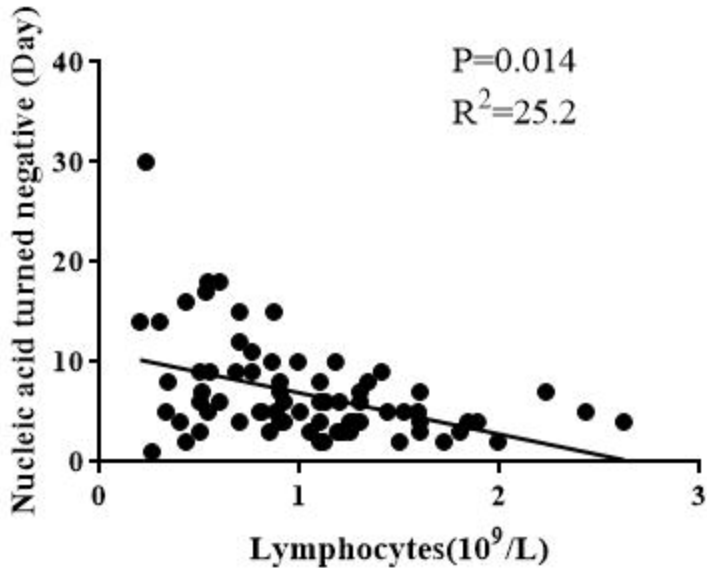

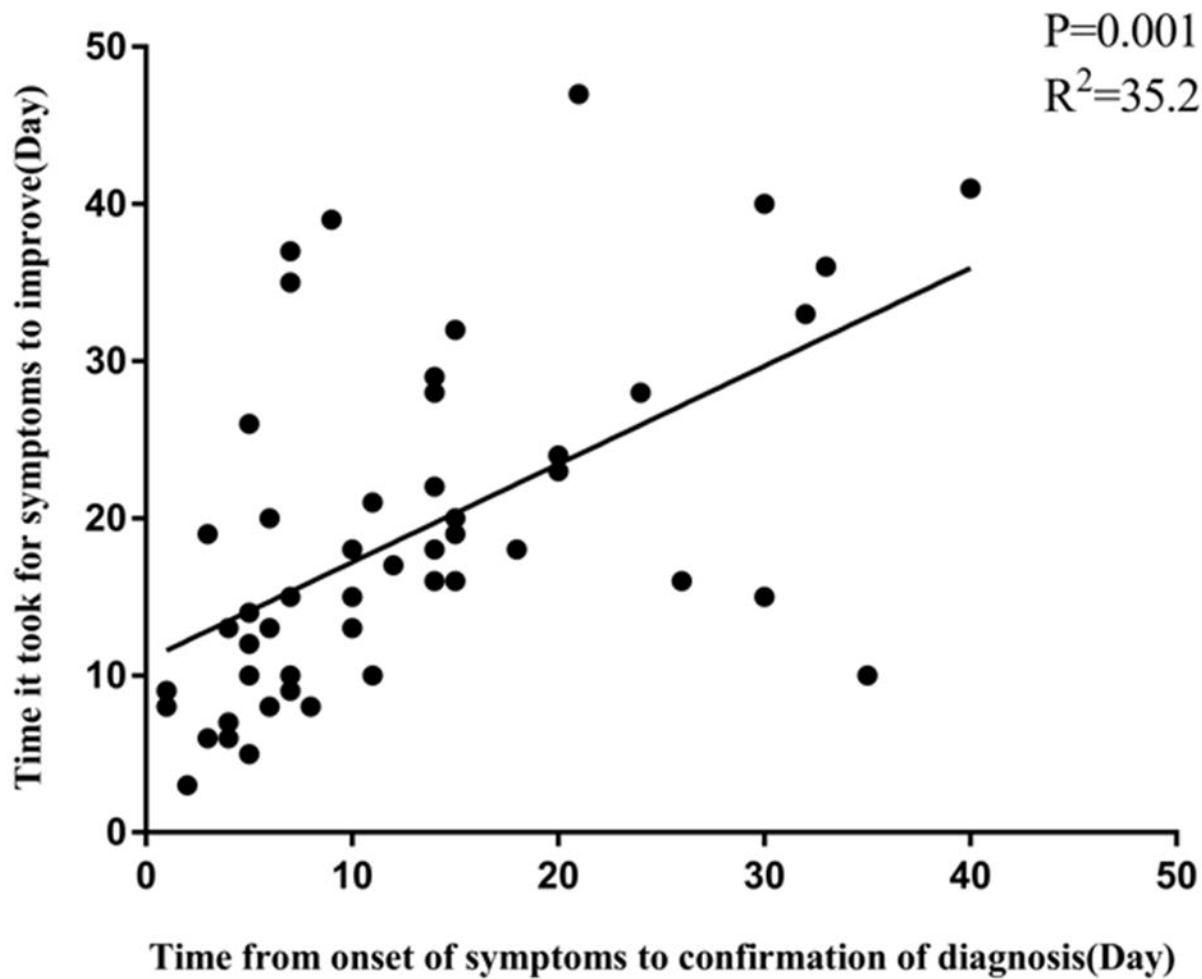

Source: https://medrxiv.org/content/medrxiv/early/2020/09/28/2020.09.26.20202234.full.pdf
